# Supplementary material
Source: PubMed Central journal article supplement (PMC5880682)
Supplement: NIHMS931867-supplement-3.pdf [file NIHMS931867-supplement-3.pdf]

A

## Top GO metabolic pathways (mouse HSCs)

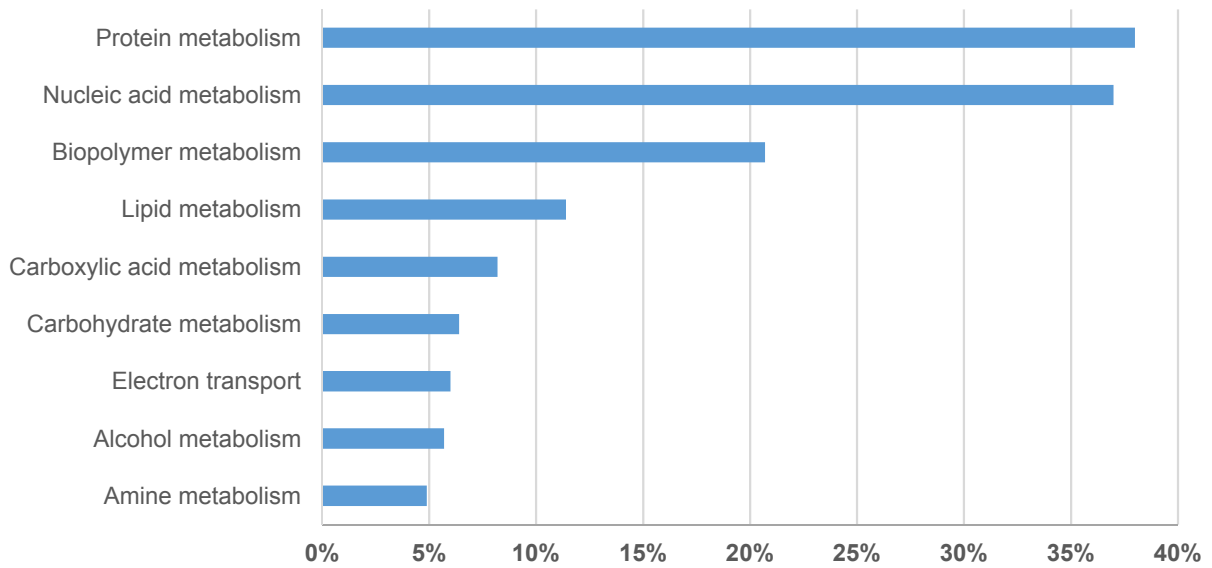

B

## Top GO metabolic pathways (human HSCs)

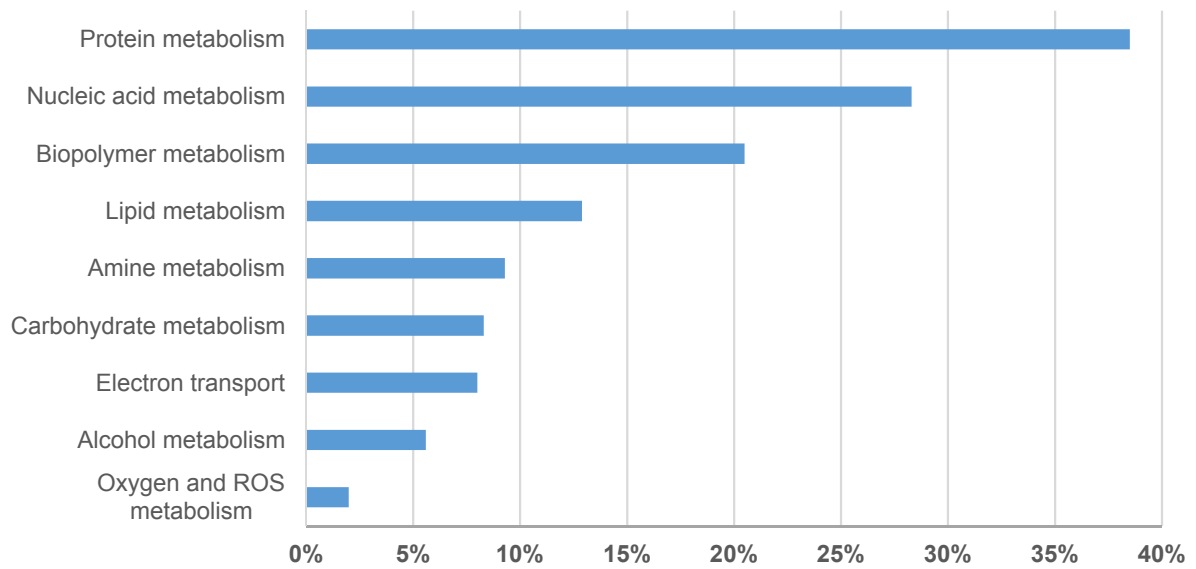

C

| Symbol  | Gene Name                                  | Biological Process            | Fold Change |
|---------|--------------------------------------------|-------------------------------|-------------|
| GLS     | glutaminase                                | Glutaminolysis                | 2.52        |
| GLS     | glutaminase                                | Glutaminolysis                | 2.86        |
| Slc38a1 | solute carrier family 38, member 1 (SNAT1) | Gln Transport, Glutaminolysis | 7.00        |
| Slc38a2 | solute carrier family 38, member 2 (SNAT2) | Gln Transport, Glutaminolysis | 2.73        |
