# Supplementary material
Source: PubMed Central journal article supplement (PMC5880682)

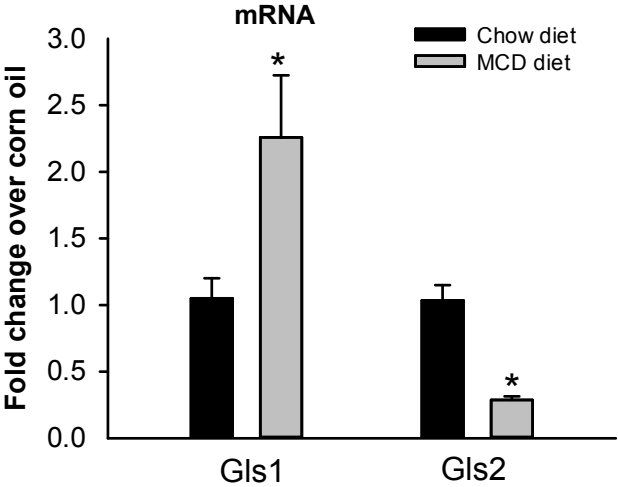

Supplement: NIHMS931867-supplement-2.pdf [file NIHMS931867-supplement-2.pdf]

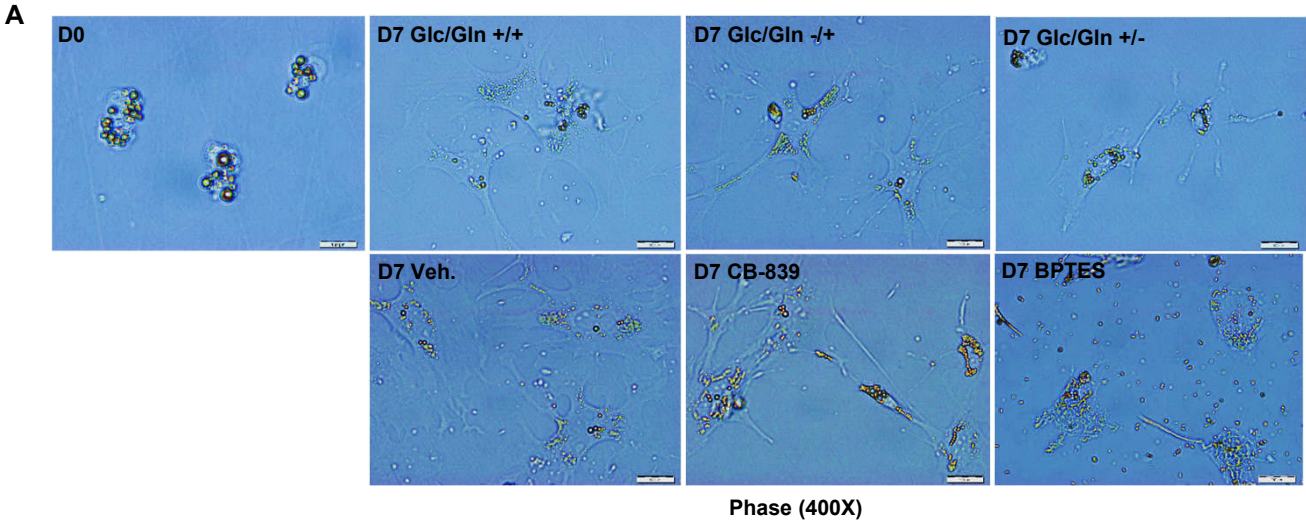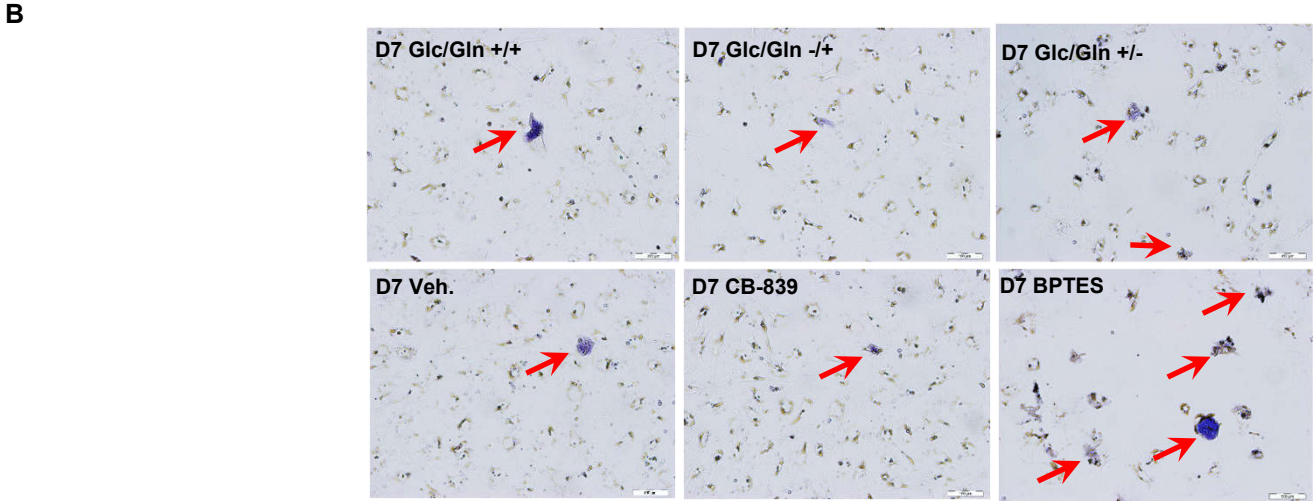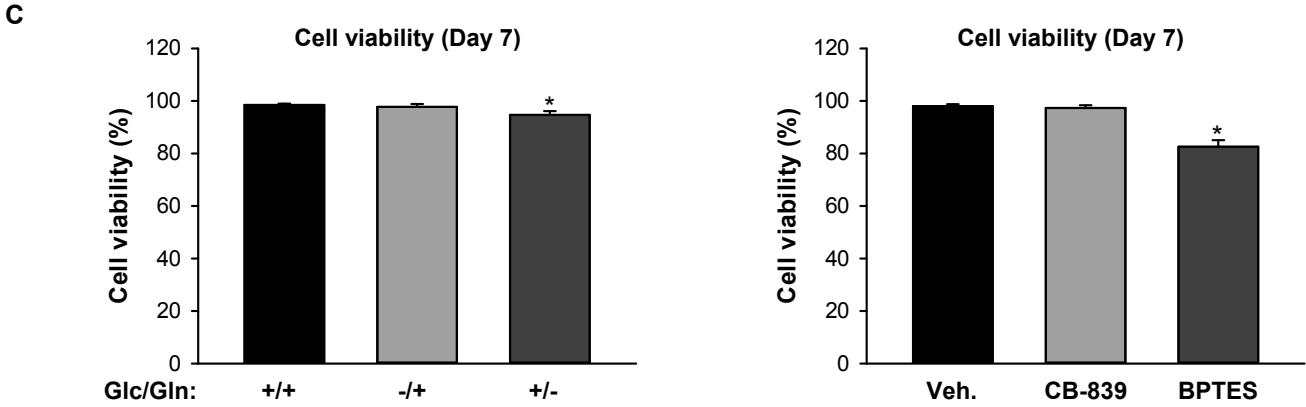

Supplement: NIHMS931867-supplement-4.pdf [file NIHMS931867-supplement-4.pdf]

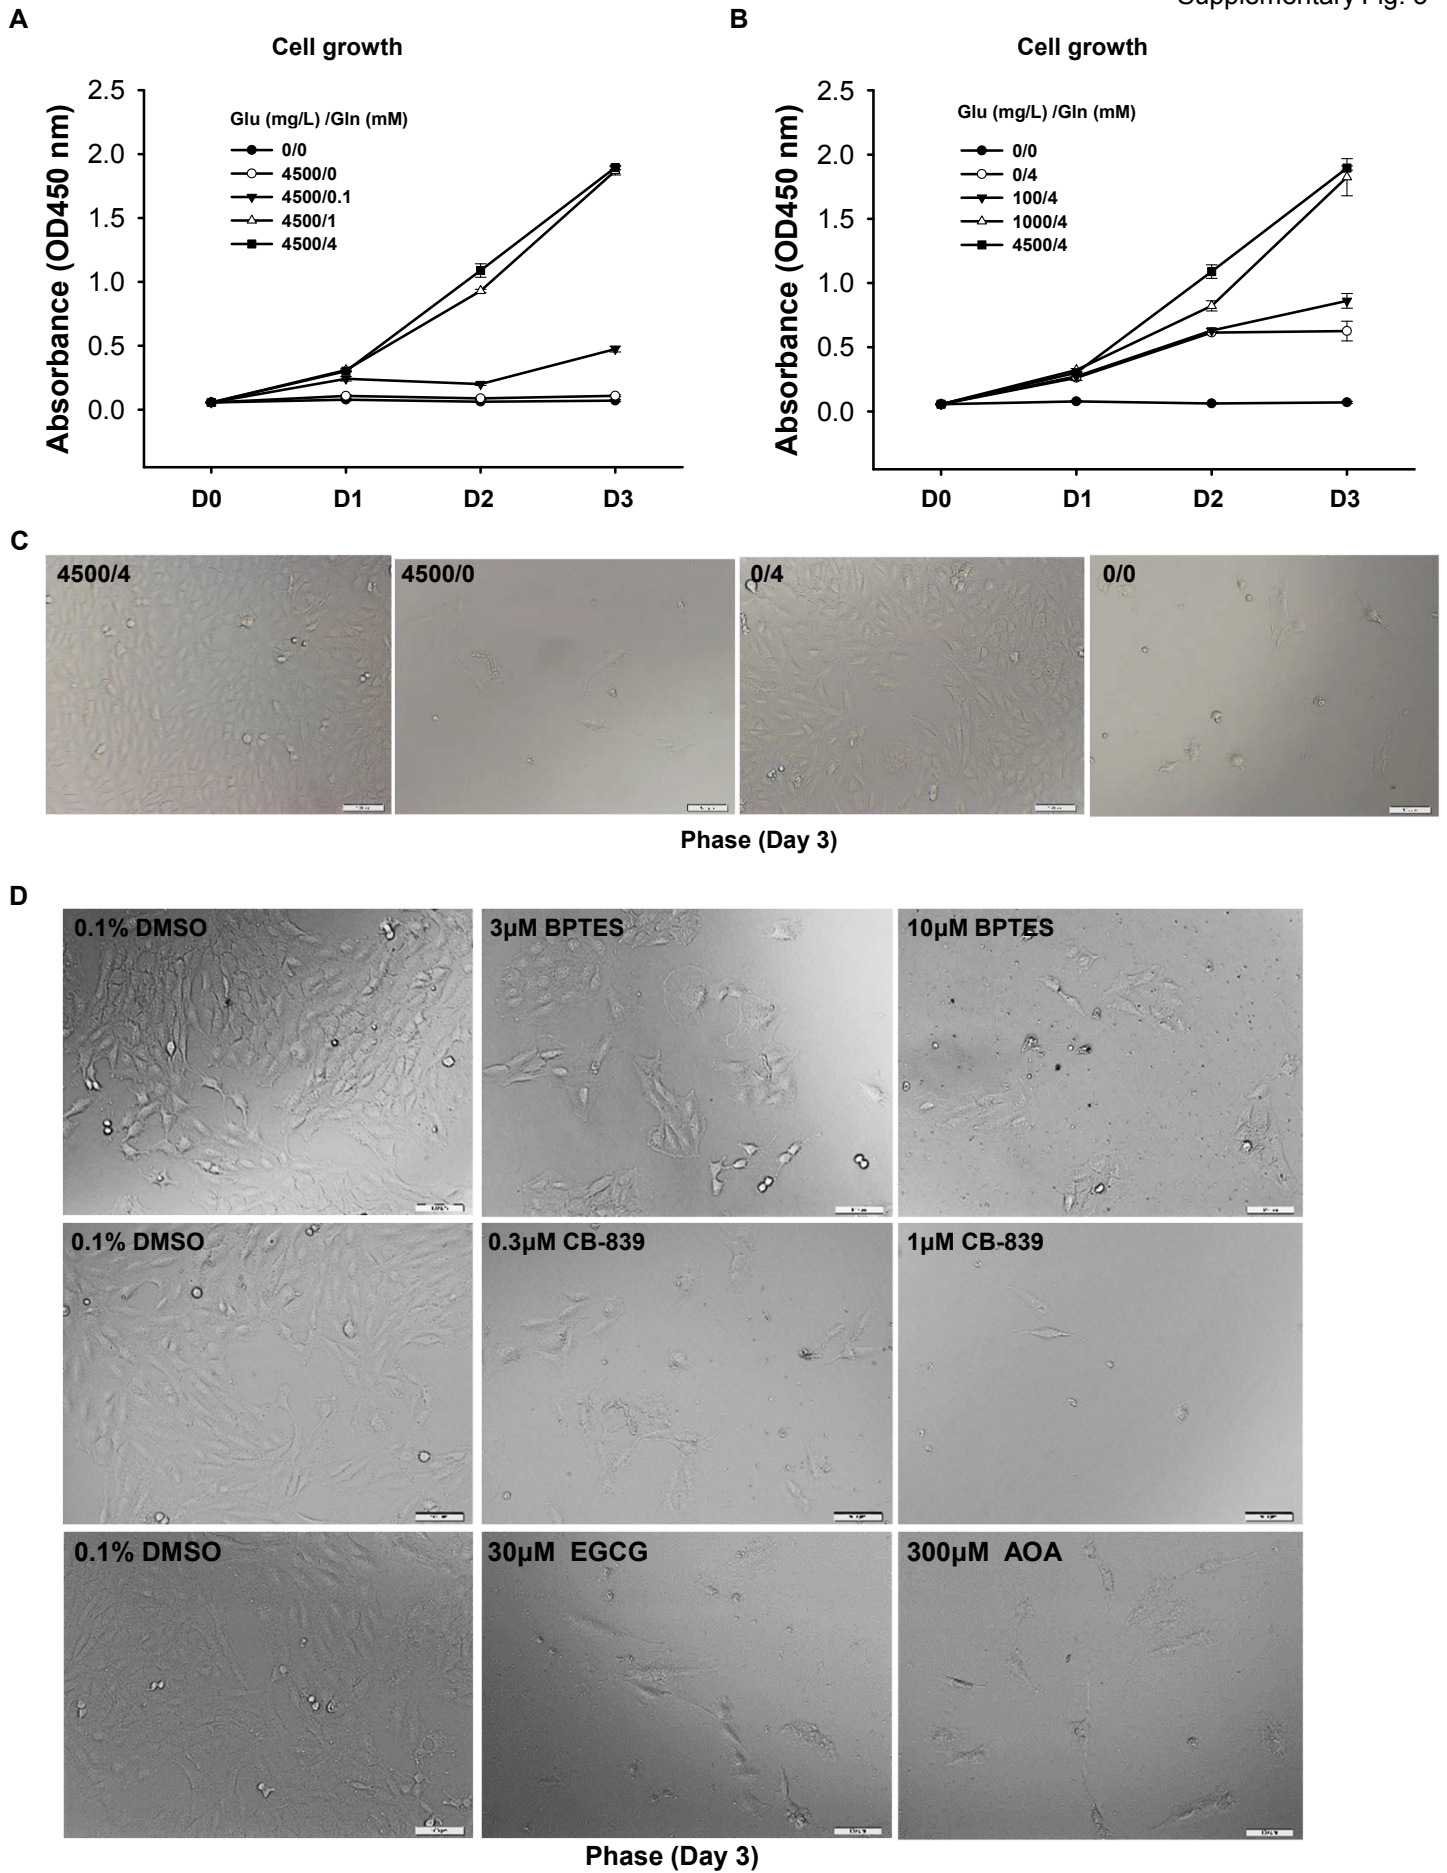

Supplement: NIHMS931867-supplement-5.pdf [file NIHMS931867-supplement-5.pdf]

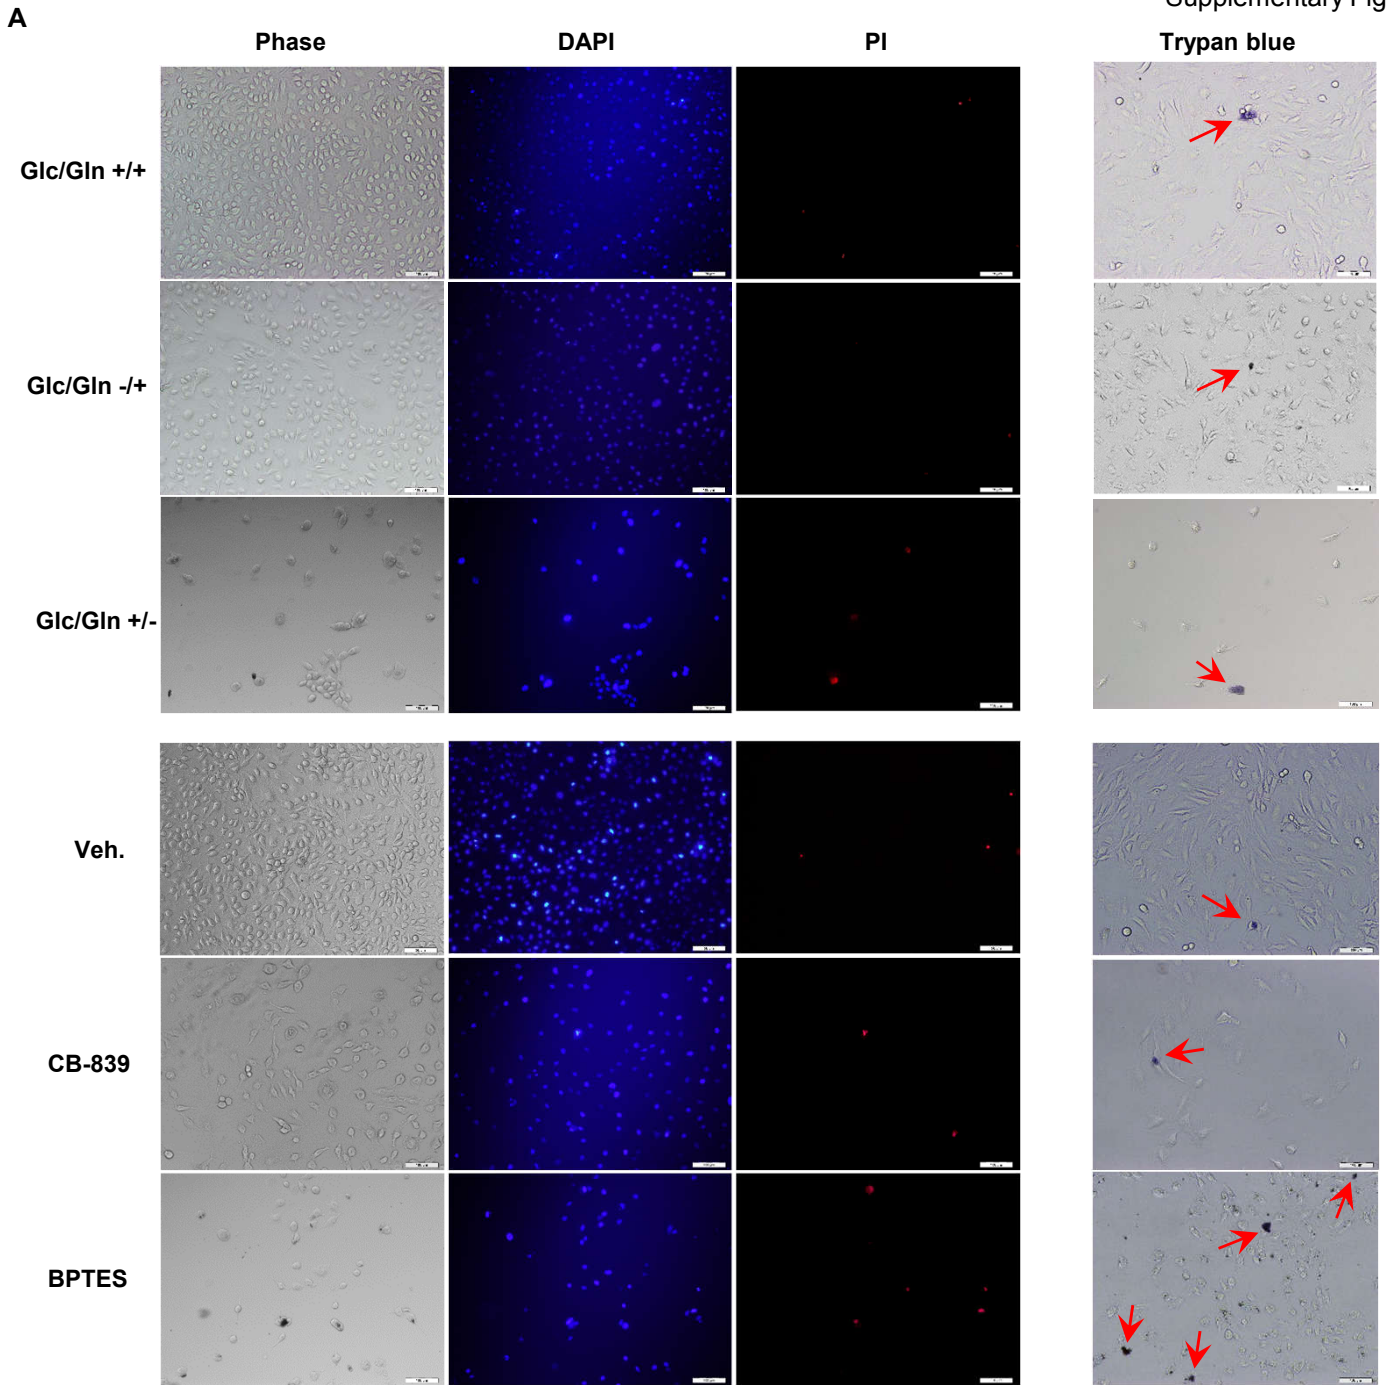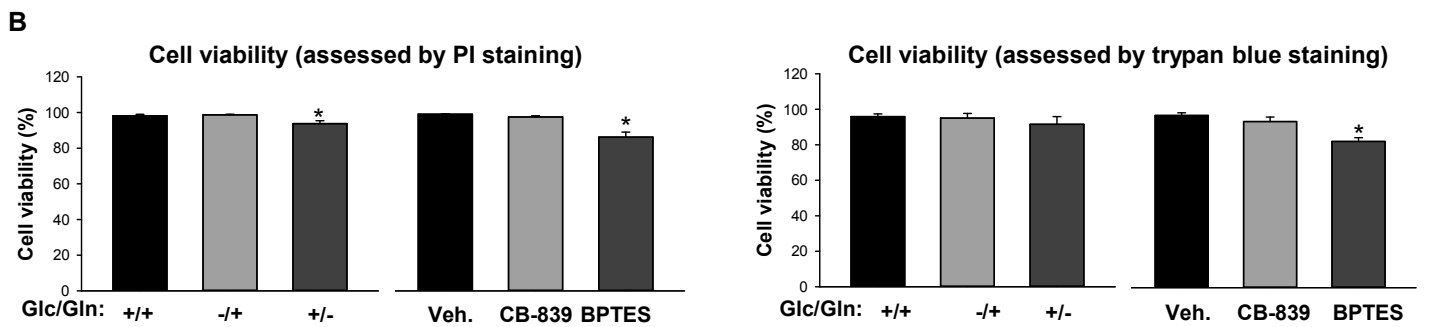

Supplement: NIHMS931867-supplement-6.pdf [file NIHMS931867-supplement-6.pdf]

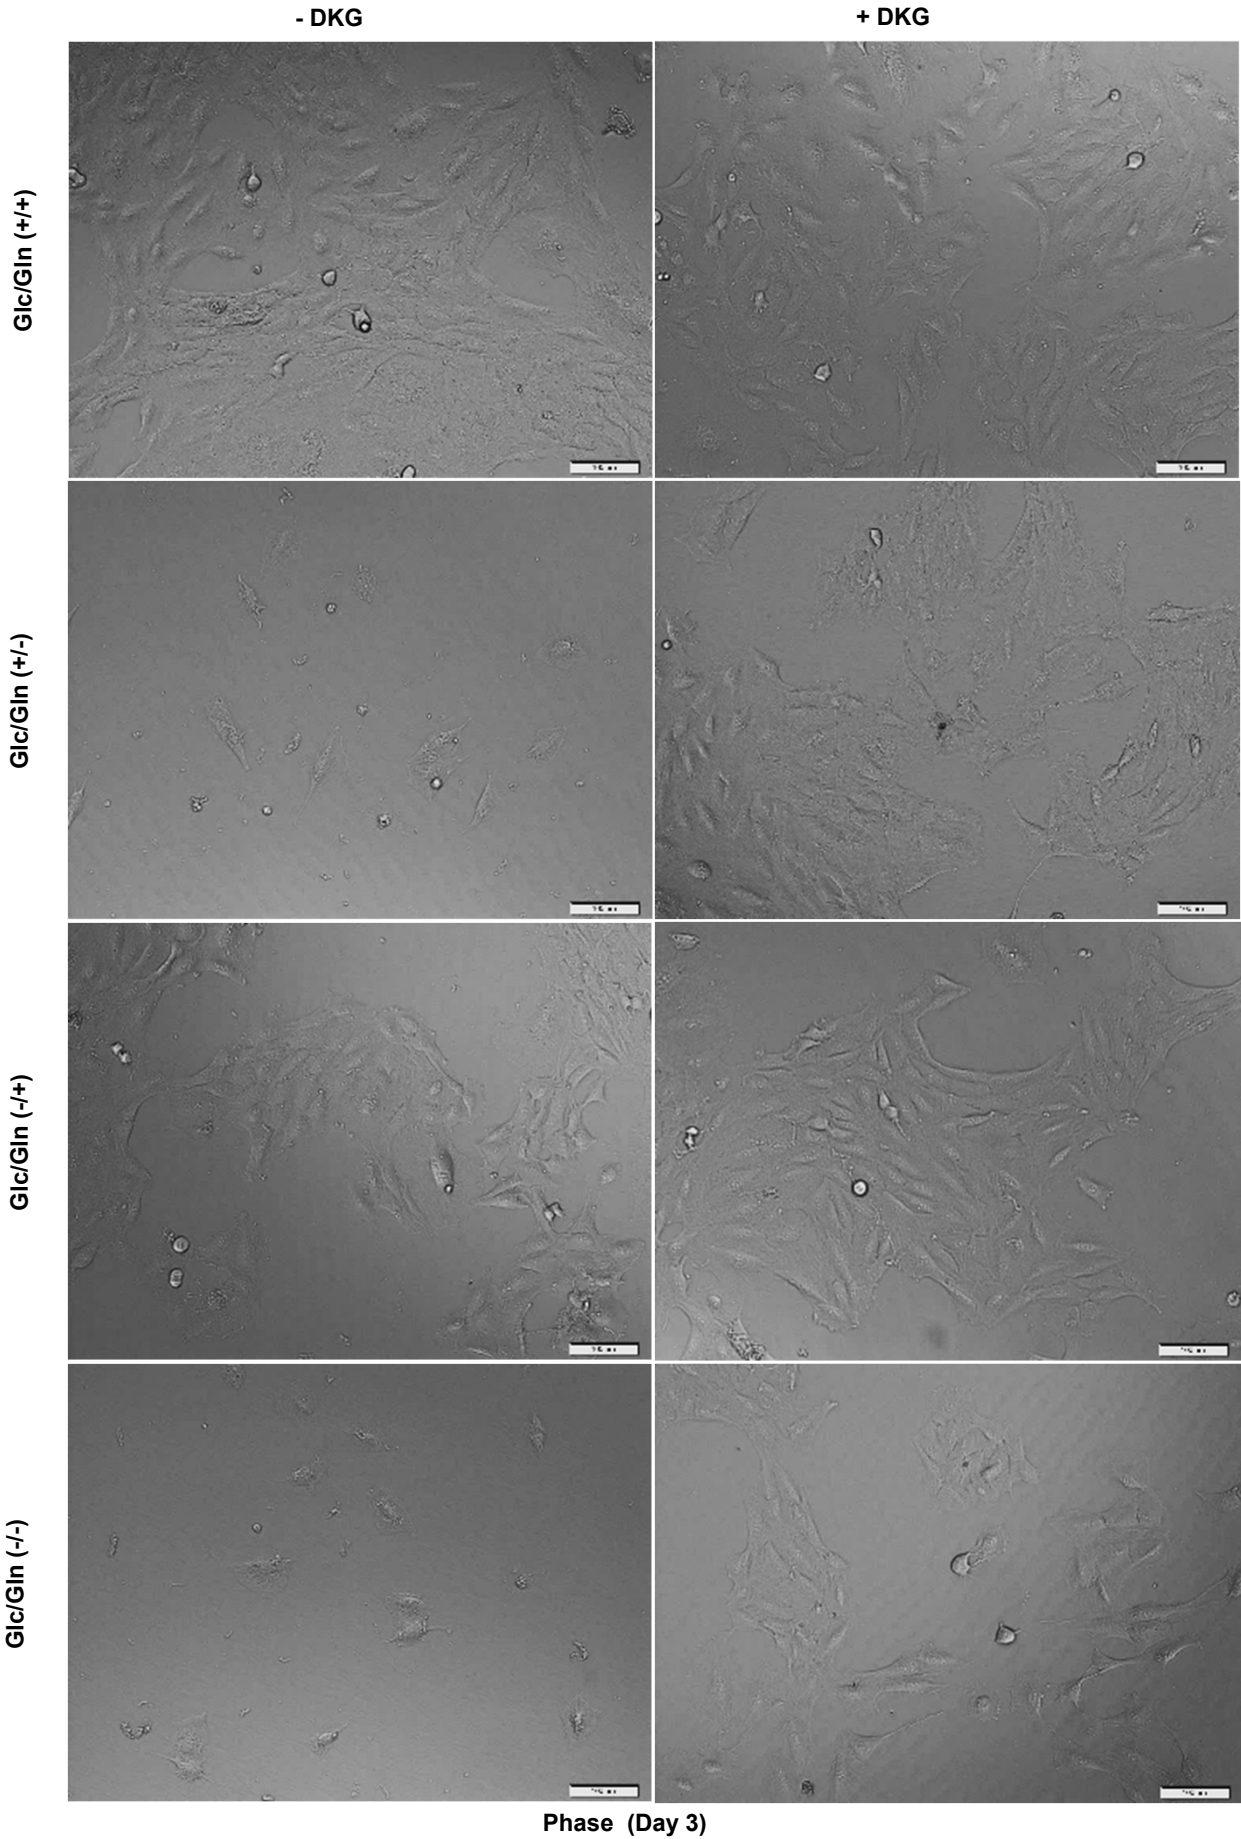

Phase (Day 3)

Supplement: NIHMS931867-supplement-7.pdf [file NIHMS931867-supplement-7.pdf]

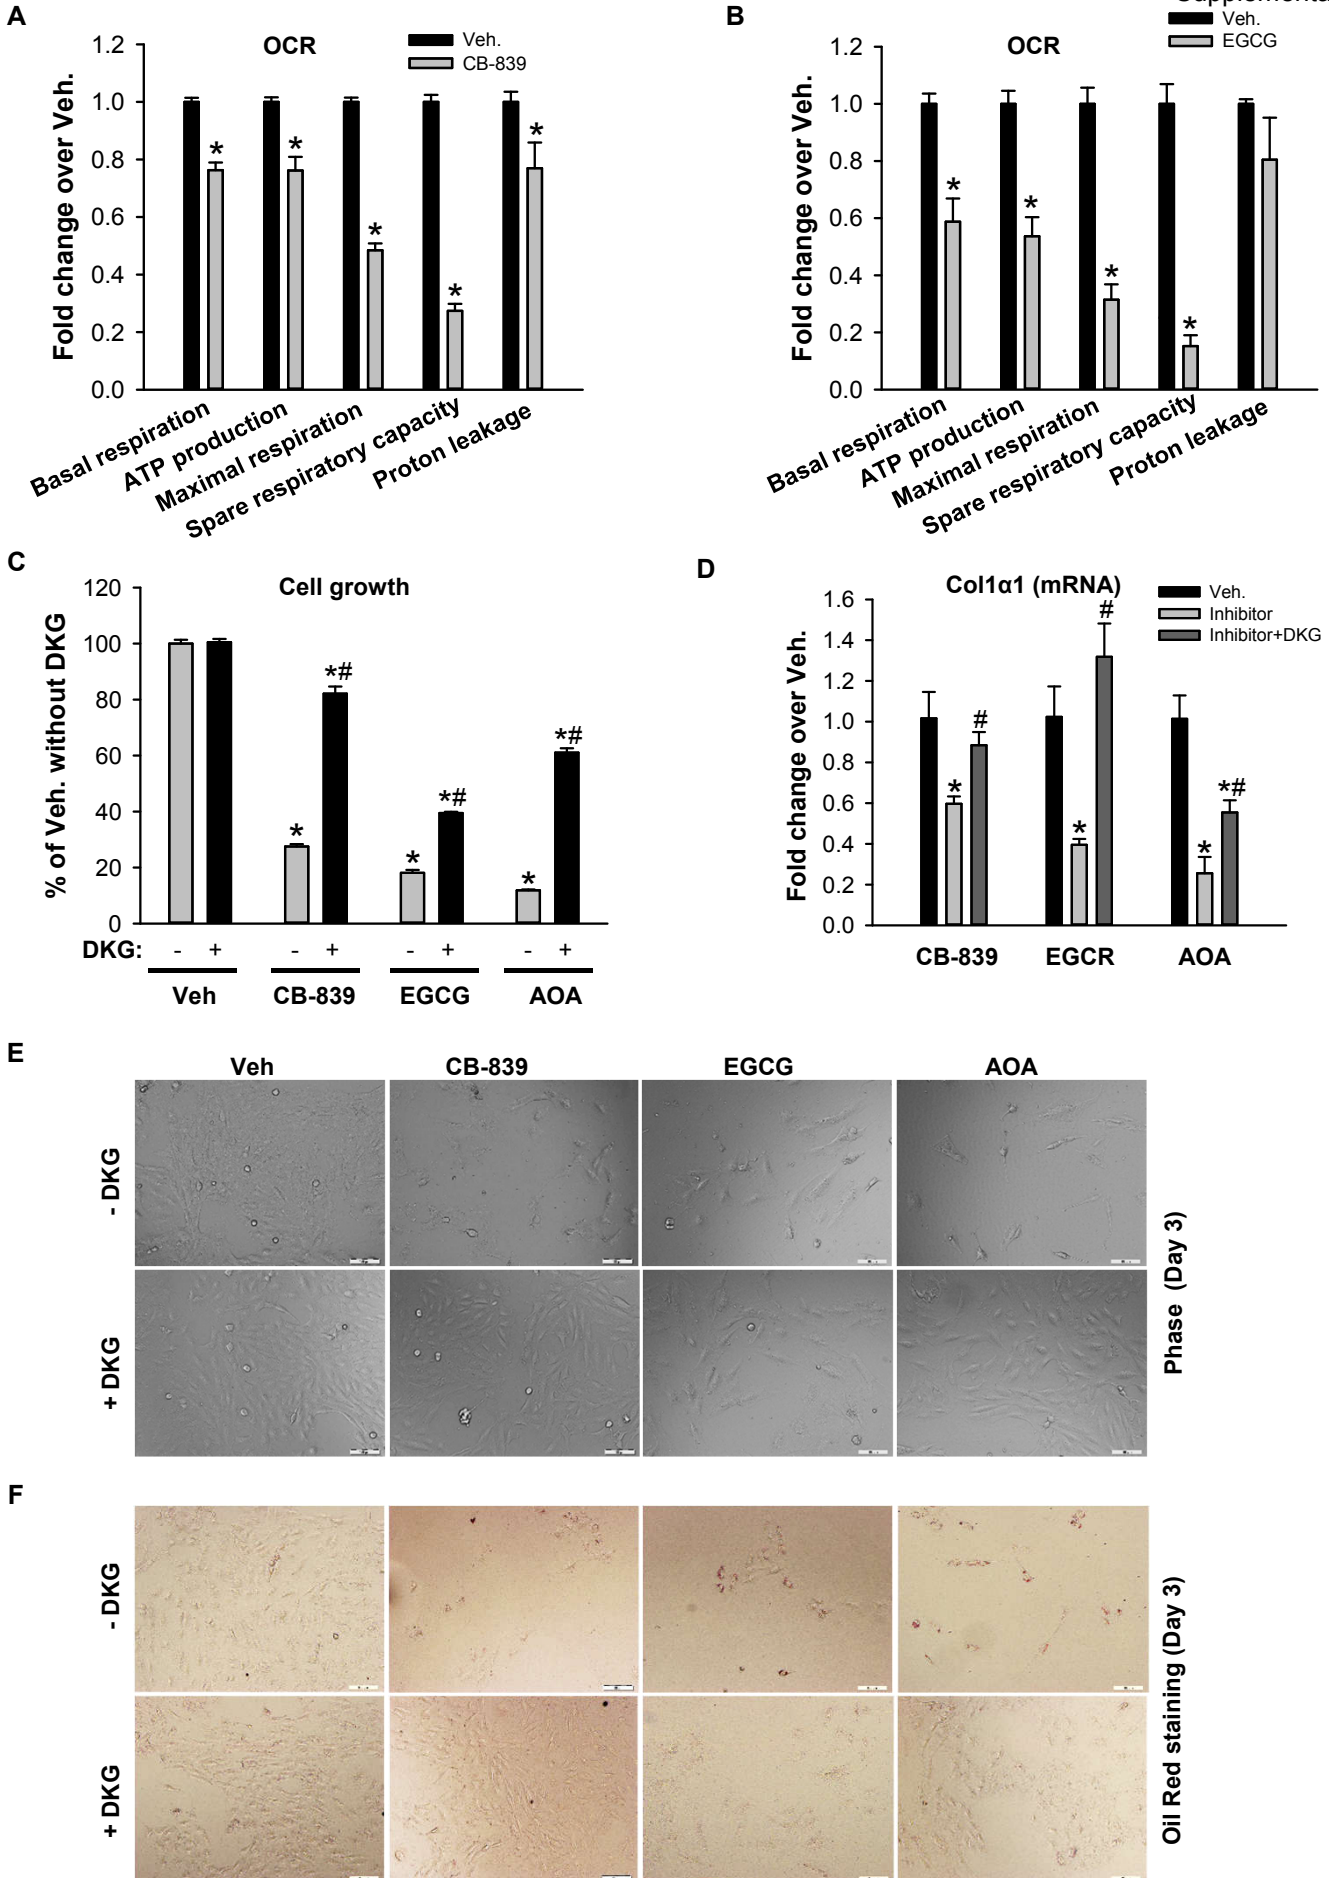

Supplement: NIHMS931867-supplement-8.pdf [file NIHMS931867-supplement-8.pdf]

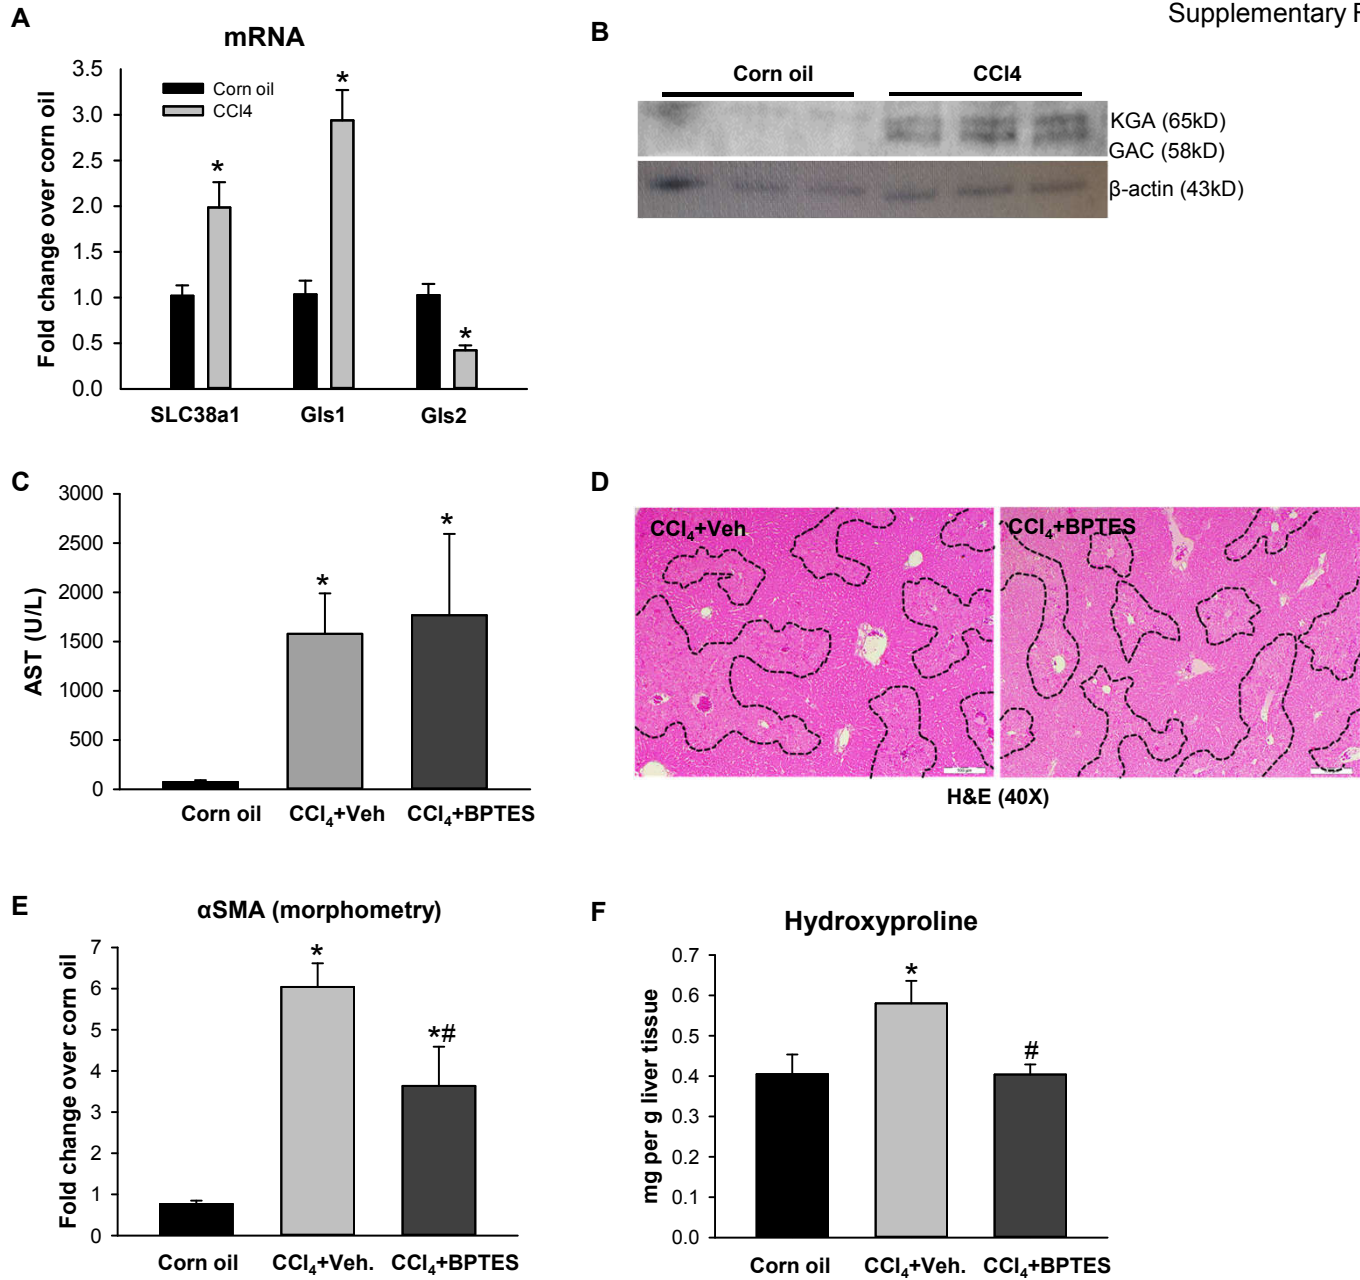

Supplement: NIHMS931867-supplement-9.pdf [file NIHMS931867-supplement-9.pdf]
